# Supplementary material
Source: Springer Nature journal article supplement (https://www.springermedizin.de/resource/supplementary/12885_2006_496_MOESM1_ESM.pdf/9469616)

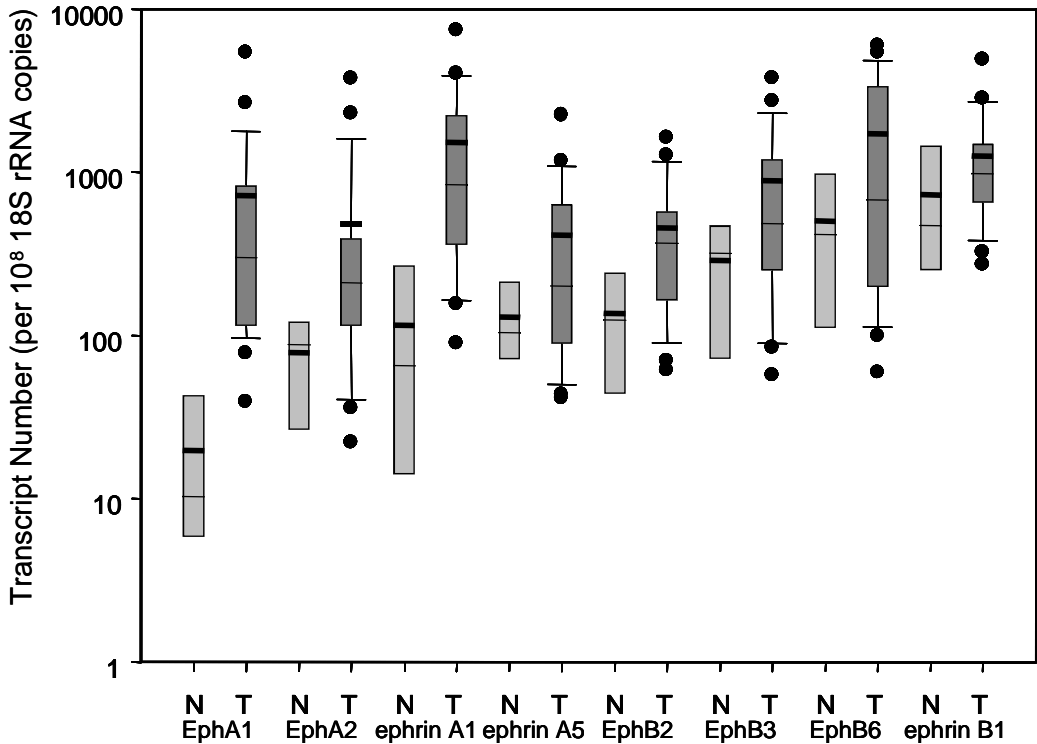

Supplement: MOESM1 [file 9469616]
